# Supplementary material
Source: Springer Nature journal article supplement (https://www.springermedizin.de/resource/supplementary/13075_2004_1584_MOESM7_ESM.pdf/9690110)

# Percent of patients with oedema with celecoxib

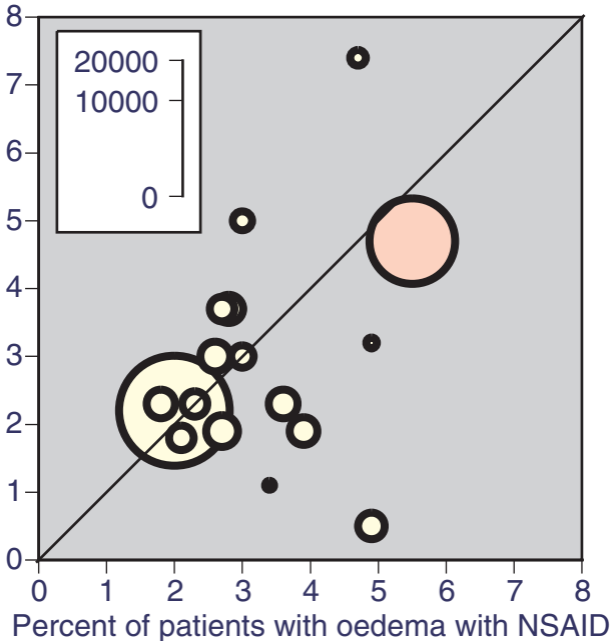

Supplement: MOESM7 [file 9690110]
